# Supplementary material
Source: PubMed Central journal article supplement (PMC5920714)
Supplement: NIHMS950902-supplement-supplement_1.pdf [file NIHMS950902-supplement-supplement_1.pdf]

**Figure 1: Final Structural Regression Model for the Relation Between SES and Colonoscopy Behavior**

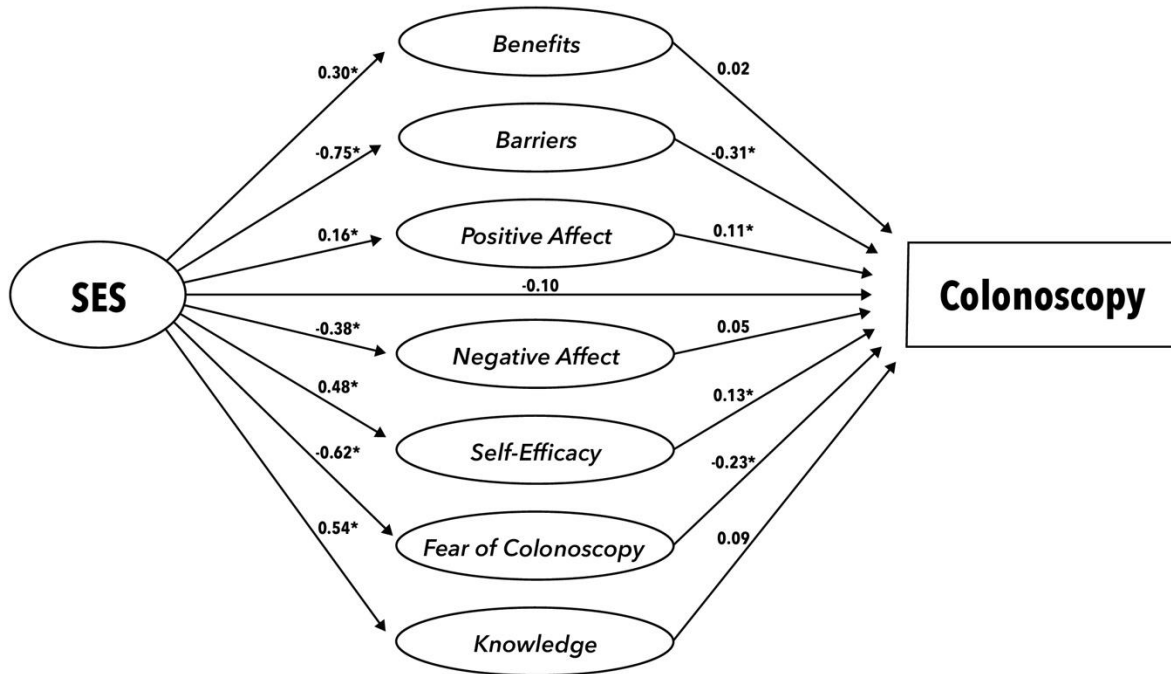

Supplementary Material: Correlation Matrix for all social cognitive constructs and colonoscopy behavior.

| <u>Variable</u>                    | <u>1</u> | <u>2</u> | <u>3</u> | <u>4</u> | <u>5</u> | <u>6</u> | <u>7</u> | <u>8</u> |
|------------------------------------|----------|----------|----------|----------|----------|----------|----------|----------|
| 1. Benefits                        | --       |          |          |          |          |          |          |          |
| 2. Barriers                        | -0.11**  | --       |          |          |          |          |          |          |
| 3. Positive Affective Associations | 0.04     | -0.07**  | --       |          |          |          |          |          |
| 4. Negative Affective Associations | -0.06*   | 0.16**   | -0.04    | --       |          |          |          |          |
| 5. Self-efficacy                   | 0.16**   | -0.25**  | 0.13**   | -0.13**  | --       |          |          |          |
| 6. Knowledge                       | 0.21**   | -0.22**  | 0.05*    | -0.05    | 0.16**   | --       |          |          |
| 7. Fear of Colonoscopy             | -0.10**  | 0.44**   | -0.12**  | 0.26**   | -0.23**  | -0.09**  | --       |          |
| 8. Colonoscopy Behavior            | 0.10**   | -0.28**  | 0.11**   | -0.06**  | 0.22**   | 0.11**   | -0.30**  | --       |

\*\*p<0.01, \*p<0.05
